# Supplementary material
Source: publisher figshare collection journal article supplement (https://frontiersin.figshare.com/ndownloader/files/35113420)
Supplement: Supplementary file [file 35113420]

## Guidelines for Reporting Reliability and Agreement Studies (GRRAS)

| Section            | Item                                                                                                                                  | Page                                                                                                                                          |
|--------------------|---------------------------------------------------------------------------------------------------------------------------------------|-----------------------------------------------------------------------------------------------------------------------------------------------|
| Title and abstract | 1. Identify in title or abstract that interrater/intrarater reliability or agreement was investigated.                                | P2                                                                                                                                            |
| Introduction       | 2. Name and describe the diagnostic or measurement device of interest explicitly.                                                     | P5                                                                                                                                            |
|                    | 3. Specify the subject population of interest                                                                                         | P4                                                                                                                                            |
|                    | 4. Specify the rater population of interest (if applicable)                                                                           | Not applicable                                                                                                                                |
|                    | 5. Describe what is already known about reliability and agreement and provide a rationale for the study (if applicable)               | P3-4                                                                                                                                          |
| Methods            | 6. Explain how the sample size was chosen. State the determined number of raters, subjects/objects, and replicate observations        | P4                                                                                                                                            |
|                    | 7. Describe the sampling method.                                                                                                      | P4                                                                                                                                            |
|                    | 8. Describe the measurement/rating process                                                                                            | P5-6                                                                                                                                          |
|                    | 9. State whether measurements/ratings were conducted independently.                                                                   | P5                                                                                                                                            |
|                    | 10. Describe the statistical analysis.                                                                                                | P6                                                                                                                                            |
| Results            | 11.. State the number of rater and subjects/objects which were included and the number of replicate observations which were conducted | We described it in the methods section as follows:<br>Number of raters: P5<br>Number of subjects: P4.<br>Number of replicate observations: P5 |

|                       |                                                                                                 |                                                                                                                                                                                        |
|-----------------------|-------------------------------------------------------------------------------------------------|----------------------------------------------------------------------------------------------------------------------------------------------------------------------------------------|
|                       | 12. Describe the sample characteristics of raters and subjects.                                 | Participants' characteristics:<br>P4                                                                                                                                                   |
|                       | 13. Report estimates of reliability and agreement including measures of statistical uncertainty | Rater's characteristics:<br>P5<br>We reported all relevant data including measures of statistical uncertainty in tables. Including standard deviation, standard error of measurements. |
| Discussion            | 14. Describe the practical relevance of results                                                 | P7-8                                                                                                                                                                                   |
| Auxiliary<br>Material | 15. Provide detailed results if possible                                                        | The detailed results have presented in the tables.                                                                                                                                     |
